# Supplementary material for: Fluorescent labelling as a tool for identifying and quantifying nanoplastics
Source: Royal Society of Chemistry journal article supplement (doi:10.1039/d4ra04526b), 2024-01-01
Supplement: d4ra04526b1.pdf [file d4ra04526b1.pdf]

## Supplementary information

### Fluorescent labelling as a tool for identifying and quantifying nanoplastics

P. Merdy, A. Bonneau, F. Delpy and Y. Lucas

Peaks coordinates in the 3D Excitation-Emission Fluorescence Matrix

| <b>Cyanine-3</b> |                |                |                |                |
|------------------|----------------|----------------|----------------|----------------|
|                  | <b>Peak 1</b>  |                | <b>Peak 3</b>  |                |
|                  | $\lambda_{ex}$ | $\lambda_{em}$ | $\lambda_{ex}$ | $\lambda_{em}$ |
| Alone            | 544            | 563            | 515            | 563            |
| with HDPE        | 545            | 564            | 515            | 564            |
| with LDPE        | 544            | 564            | 515            | 563            |
| with PP          | 544            | 564            | 514            | 564            |
| with PS          | 507            | 526            | 476            | 526            |
| with PVC         | 500            | 519            | 469            | 519            |
| with PET         | 513            | 534            | 482            | 534            |

  

| <b>Fluoresceine</b> |                |                |                |                |
|---------------------|----------------|----------------|----------------|----------------|
|                     | <b>Peak 1</b>  |                | <b>Peak 5</b>  |                |
|                     | $\lambda_{ex}$ | $\lambda_{em}$ | $\lambda_{ex}$ | $\lambda_{em}$ |
| Alone               | 250            | 510            | 488            | 515            |
| with HDPE           | 235            | 525            | 477            | 515            |
| with LDPE           | 265            | 510            | 440            | 515            |
| with PP             | 250            | 515            | 457            | 515            |
| with PS             | 250            | 510            | 437            | 516            |
| with PVC            | 250            | 520            | 489            | 515            |
| with PET            | 245            | 510            | 489            | 515            |

  

| <b>Rhodamine-6G</b> |                |                |                |                |                |                |                |                |
|---------------------|----------------|----------------|----------------|----------------|----------------|----------------|----------------|----------------|
|                     | <b>Peak 1</b>  |                | <b>Peak 2</b>  |                | <b>Peak 3</b>  |                | <b>Peak 4</b>  |                |
|                     | $\lambda_{ex}$ | $\lambda_{em}$ | $\lambda_{ex}$ | $\lambda_{em}$ | $\lambda_{ex}$ | $\lambda_{em}$ | $\lambda_{ex}$ | $\lambda_{em}$ |
| Alone               | 246            | 549            | 276            | 549            | 347            | 549            | 500            | 550            |
| with HDPE           | 239            | 510            | 277            | 509            | 321            | 510            | 490            | 514            |
| with LDPE           | 239            | 510            | 279            | 510            | 321            | 512            | 486            | 515            |
| with PP             | 247            | 547            | 275            | 547            | 346            | 547            | 500            | 547            |
| with PS             | 239            | 510            | 320            | 510            | /              | /              | 488            | 513            |
| with PVC            | 246            | 548            | 278            | 548            | 346            | 548            | 500            | 547            |

  

| <b>Vat Red</b> |                |                |                |                |
|----------------|----------------|----------------|----------------|----------------|
|                | <b>Peak 1</b>  |                | <b>Peak 2</b>  |                |
|                | $\lambda_{ex}$ | $\lambda_{em}$ | $\lambda_{ex}$ | $\lambda_{em}$ |
| Alone          | 239            | 355            | 285            | 350            |
| with HDPE      | 240            | 355            | 290            | 350            |
| with LDPE      | 240            | 355            | 285            | 350            |
| with PP        | 240            | 355            | 290            | 350            |
| with PS        | 240            | 355            | 285            | 350            |
| with PVC       | 255            | 355            | 287            | 357            |
| with PET       | 240            | 355            | 290            | 350            |
